# Supplementary material
Source: PubMed Central journal article supplement (PMC7561076)
Supplement: NIHMS1635455-supplement-1.pdf [file NIHMS1635455-supplement-1.pdf]

MY GOALS OF CARE ARE: (check all that apply)

## Part 2. Clinicians' Assessment

## PATIENT CENTERED MEDICATION ASSESSMENT

INDICATION FOR MEDICATION REVIEW:

- ☐ > 10 daily medications
- ☐ recent hospitalization
- ☐ difficulty taking medications by mouth
- ☐ cost
- ☐ other: \_\_\_\_\_

[illegible]

### Part 3. Nurses' Assessment

## PATIENT CENTERED MEDICATION ASSESSMENT

## INDICATION FOR MEDICATION REVIEW:

- ☐ > 10 daily medications
- ☐ recent hospitalization
- ☐ difficulty taking medications by mouth
- ☐ cost
- ☐ other:

### GOALS OF ONCOLOGIC CARE:

- ☐ Palliative
- ☐ Maintenance therapy
- ☐ Disease control
- ☐ Curative therapy
- ☐ other:

[illegible]

### EXAMPLES OF ROLE OF MEDICATION\*

Symptom management: Analgesics, pulmonary, bowel meds, appetite stimulants, anxiety, sleep, behavior management, depression, calcitonin or vit D for bone pain

Treatment: antihypertensives, diuretics, nitroglycerin

**2° prevention:** statins in CAD, bisphosphonates for osteoporosis, calcitonin or vit D for osteoporosis

1° prevention: Calcium for osteoporosis, Aspirin for CAD
